# Supplementary material
Source: PubMed Central journal article supplement (PMC4742985)
Supplement: Supp_Data.pdf [file Supp_Data.pdf]

## Supplementary Data

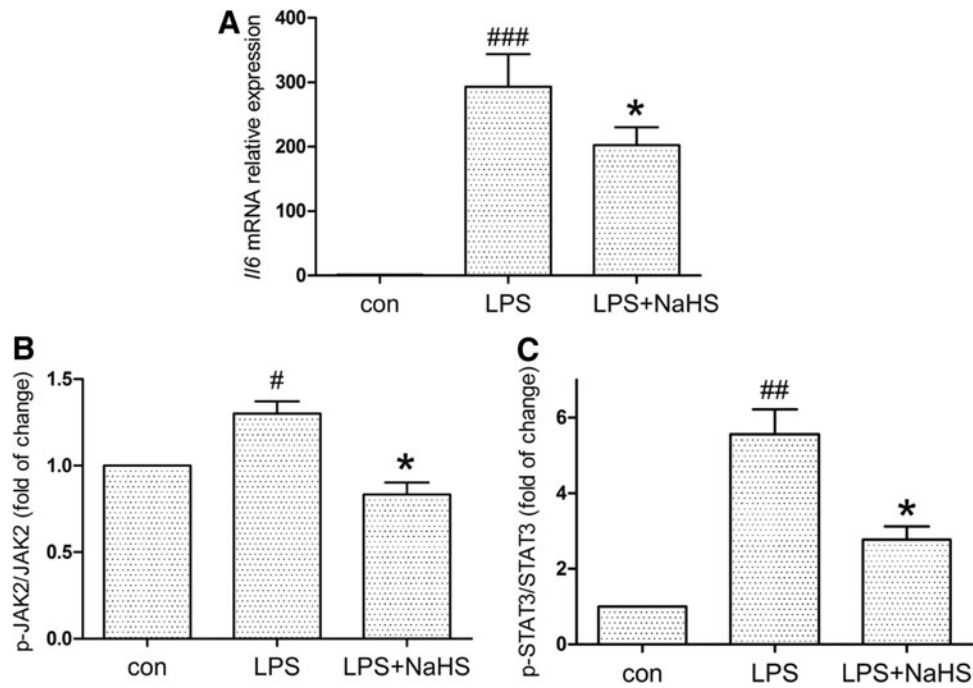

**SUPPLEMENTARY FIG. S1. NaHS suppressed the hepatic *Il-6* mRNA level and JAK2/STAT3 phosphorylation in LPS-challenged C57BL/6 mice.** (A) The hepatic *Il-6* mRNA level was dramatically induced by LPS (0.5 mg/kg), but suppressed by NaHS (6 mg/kg) treatment ( $n=6$ ). (B, C) Densitometry analysis of immunoblots with hepatic JAK2/STAT3 phosphorylation ( $n=6$ ). Data are represented as the mean  $\pm$  SEM. # $p < 0.05$ , ## $p < 0.01$ , and ### $p < 0.001$  compared with the control group; \* $p < 0.05$ , compared with the LPS group. JAK2, Janus kinase 2; LPS, lipopolysaccharide; STAT3, signal transducer and activator of transcription 3.

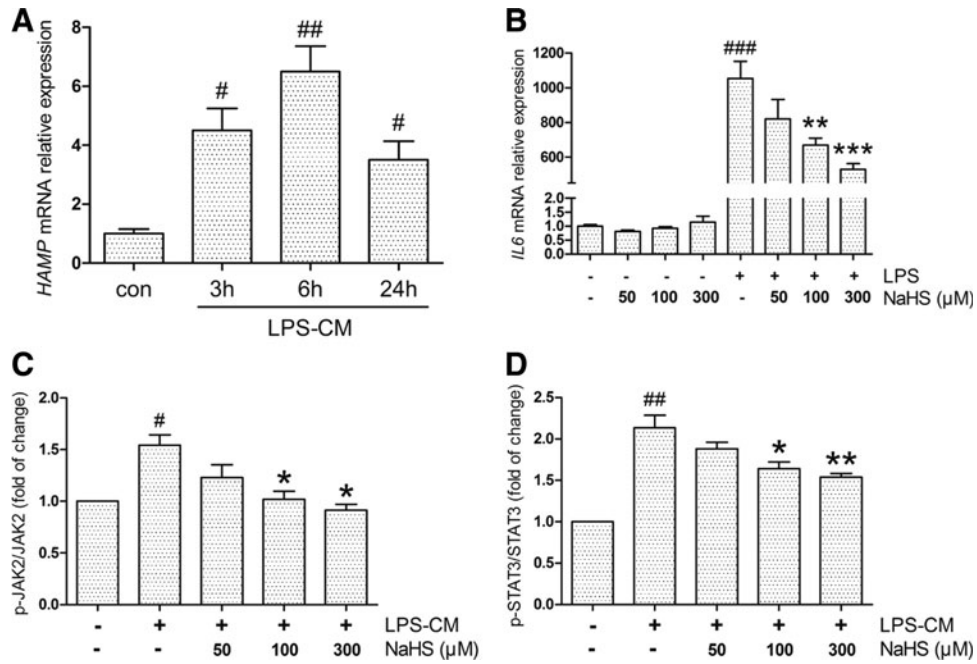

**SUPPLEMENTARY FIG. S2. NaHS decreased IL-6 expression and JAK2/STAT3 activation in the pretreatment model.** (A) Time course valuation of *HAMP* induction by LPS-CM. *HAMP* mRNA level in Huh7 cells was analyzed after incubation with LPS-CM for different hours ( $n=3$ ). (B) *IL6* mRNA level in THP-1 cells treated with NaHS in the absence or presence of LPS. NaHS suppressed *IL6* mRNA expression induced by LPS (1  $\mu\text{g}/\text{ml}$ ), while elicited no significant effect without LPS stimulation ( $n=3$ ). (C, D) Densitometry analysis of JAK2/STAT3 activation in Huh7 cells treated by LPS-CM and NaHS ( $n=4$ ). Data are represented as the mean  $\pm$  SEM of three individual experiments. # $p < 0.05$ , ## $p < 0.01$ , and ### $p < 0.001$  compared with the control group; \* $p < 0.05$ , \*\* $p < 0.01$ , and \*\*\* $p < 0.001$  compared with the LPS or LPS-CM group. CM, conditioned medium; IL-6, interleukin-6.

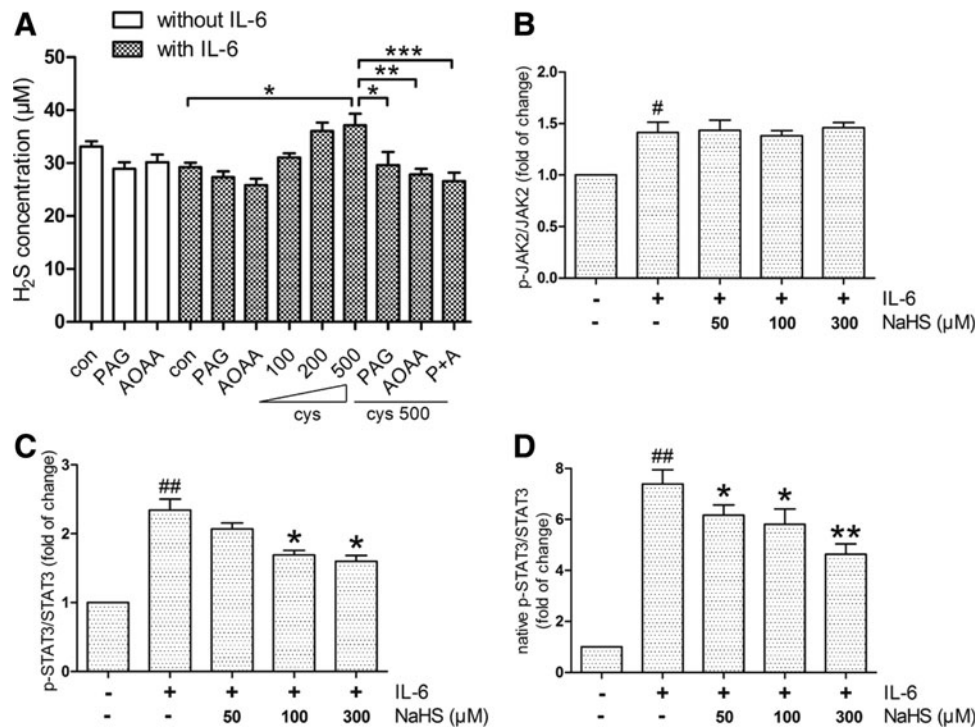

**SUPPLEMENTARY FIG. S3. H<sub>2</sub>S attenuated STAT3 activation via a JAK2-independent manner in the post-treatment model.** (A) H<sub>2</sub>S concentration in culture medium of Huh7 cells ( $n=3$ ). H<sub>2</sub>S level was increased by L-cysteine (100–500 μM), but inhibited by PAG (2 mM) and AOAA (10 μM). (B, C) Densitometry analysis of JAK2/STAT3 phosphorylation of Huh7 cells in the post-treatment model ( $n=4$ ). (D) Densitometry analysis of native p-STAT3 dimers in Huh7 cells ( $n=4$ ). Data are represented as the mean ± SEM of three individual experiments. # $p < 0.05$  and ## $p < 0.01$  compared with the control group; \* $p < 0.05$ , \*\* $p < 0.01$ , and \*\*\* $p < 0.001$  compared with the IL-6 group unless indicated. P and A stand for PAG and AOAA, respectively. AOAA, aminooxyacetic acid; PAG, propargylglycine.

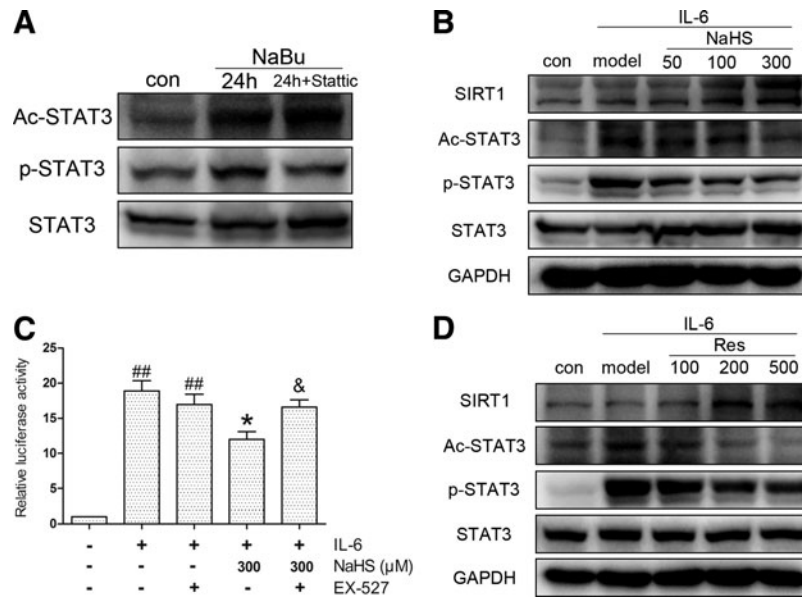

**SUPPLEMENTARY FIG. S4. Evaluation of STAT3 acetylation and SIRT1 in the induction of hepcidin.** (A) NaBu (1 mM), an HDAC inhibitor, increased the STAT3 acetylation level and added to STAT3 phosphorylation as well ( $n=3$ ). The induction in p-STAT3 was abolished by stattic (10  $\mu$ M). (B) NaHS promoted SIRT1 expression and suppressed IL-6-induced STAT3 acetylation and phosphorylation in mouse primary hepatocytes ( $n=3$ ). (C) EX-527 (10  $\mu$ M) blocked the inhibition of NaHS on STAT3 transcriptional function assessed by SIE reporter ( $n=5$ ). (D) Resveratrol pretreatment, similar to NaHS, promoted SIRT1 and inhibited STAT3 acetylation and phosphorylation irritated by IL-6 ( $n=3$ ). GAPDH served as the loading control. Representative immunoblots are presented. Data are represented as the mean  $\pm$  SEM of three individual experiments. <sup>##</sup> $p < 0.01$  compared with the control group; <sup>\*</sup> $p < 0.05$  compared with the IL-6 group; <sup>&</sup> $p < 0.05$  compared with the IL-6+NaHS group. GAPDH, glyceraldehyde-3-phosphate dehydrogenase; SIRT1, sirtuin 1.

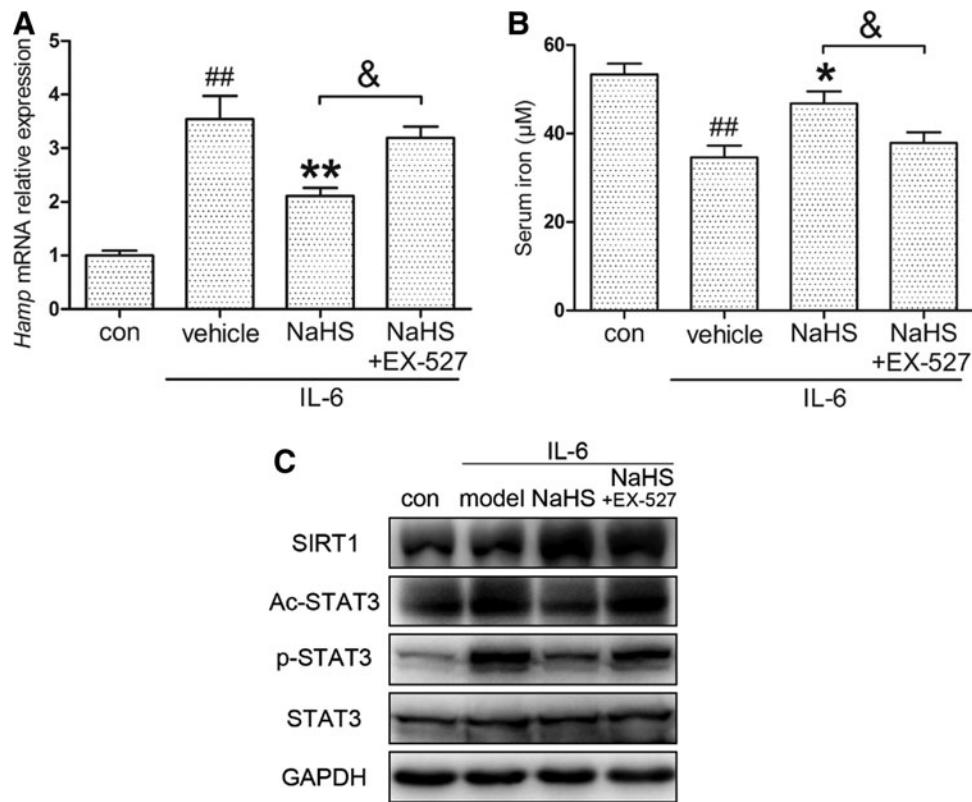

**SUPPLEMENTARY FIG. S5. NaHS inhibited hepatic hepcidin via SIRT1 in mice injected with IL-6.** C57BL/6 mice were pretreated with NaHS for 3 days (6 mg/kg/day). EX-527 (10 mg/kg) was applied 1 h before the last NaHS injection. Mice were sacrificed 6 h after IL-6 (25 µg/g) challenge. (A) NaHS attenuated the hepatic *Hamp* level, which was abolished by EX-527 ( $n=6$ ). (B) EX-527 diminished the improvement of serum iron by NaHS ( $n=6$ ). (C) Inhibition of SIRT1 by EX-527 reversed STAT3 acetylation and phosphorylation ( $n=6$ ). GAPDH served as the loading control. Representative immunoblots are presented. Data are represented as the mean  $\pm$  SEM of three individual experiments. <sup>##</sup> $p < 0.01$  compared with the control group; <sup>\*</sup> $p < 0.05$  and <sup>\*\*</sup> $p < 0.01$  compared with the IL-6 group; <sup>&</sup> $p < 0.05$  compared with the IL-6 + NaHS group.
