# Supplementary material
Source: PubMed Central journal article supplement (PMC4742985)
Supplement: Supp_Figure1.pdf [file Supp_Figure1.pdf]

## Supplementary Data

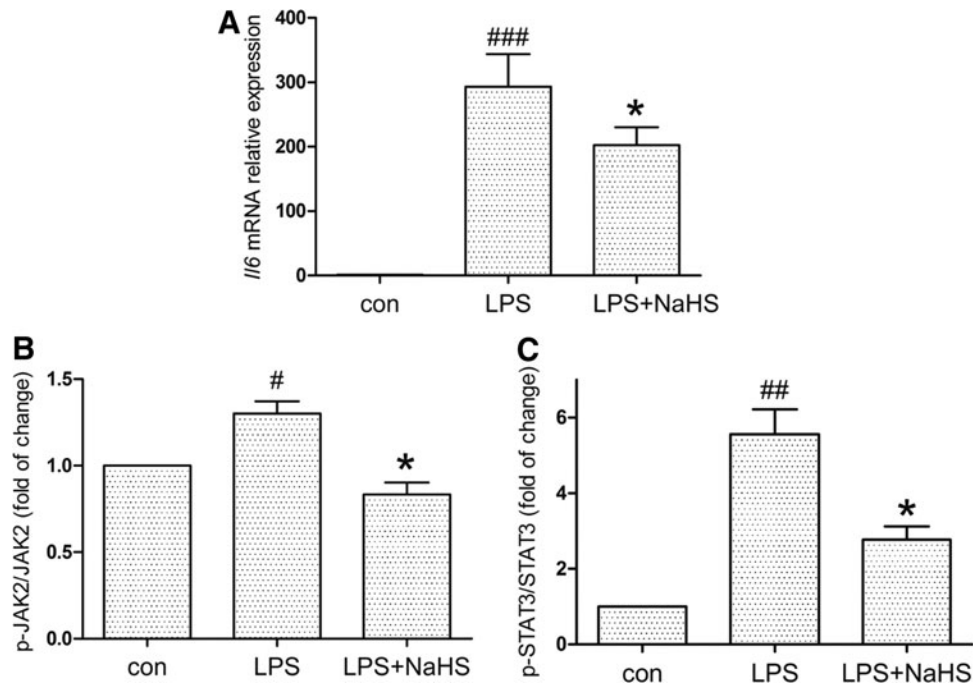

**SUPPLEMENTARY FIG. S1. NaHS suppressed the hepatic *Il-6* mRNA level and JAK2/STAT3 phosphorylation in LPS-challenged C57BL/6 mice.** (A) The hepatic *Il-6* mRNA level was dramatically induced by LPS (0.5 mg/kg), but suppressed by NaHS (6 mg/kg) treatment ( $n=6$ ). (B, C) Densitometry analysis of immunoblots with hepatic JAK2/STAT3 phosphorylation ( $n=6$ ). Data are represented as the mean  $\pm$  SEM. # $p < 0.05$ , ## $p < 0.01$ , and ### $p < 0.001$  compared with the control group; \* $p < 0.05$ , compared with the LPS group. JAK2, Janus kinase 2; LPS, lipopolysaccharide; STAT3, signal transducer and activator of transcription 3.
