# Supplementary material
Source: PubMed Central journal article supplement (PMC4742985)
Supplement: Supp_Figure2.pdf [file Supp_Figure2.pdf]

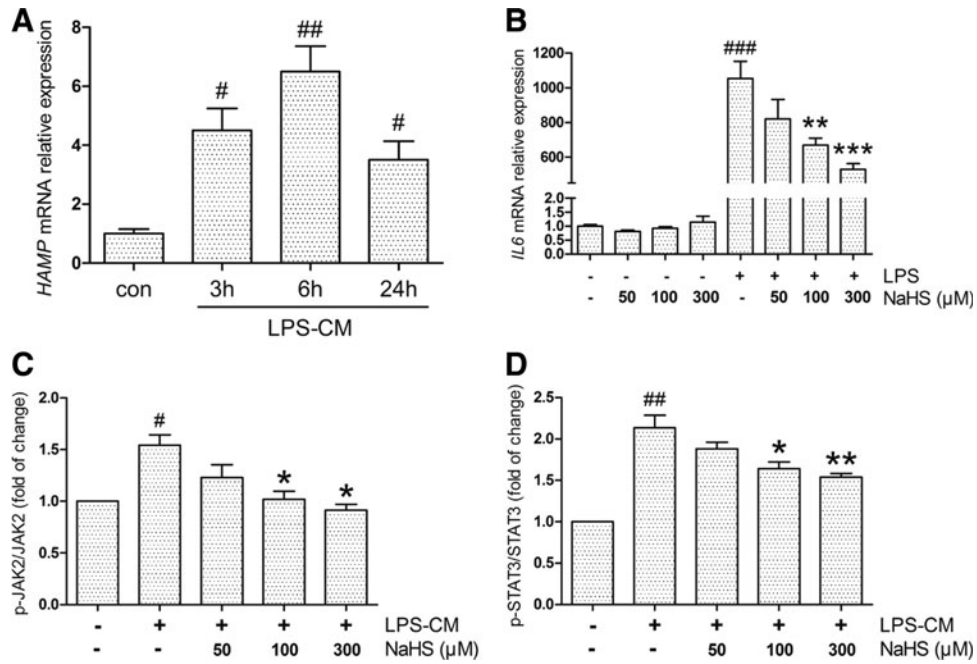

**SUPPLEMENTARY FIG. S2. NaHS decreased IL-6 expression and JAK2/STAT3 activation in the pretreatment model.** (A) Time course valuation of *HAMP* induction by LPS-CM. *HAMP* mRNA level in Huh7 cells was analyzed after incubation with LPS-CM for different hours ( $n=3$ ). (B) *IL6* mRNA level in THP-1 cells treated with NaHS in the absence or presence of LPS. NaHS suppressed *IL6* mRNA expression induced by LPS (1  $\mu\text{g}/\text{ml}$ ), while elicited no significant effect without LPS stimulation ( $n=3$ ). (C, D) Densitometry analysis of JAK2/STAT3 activation in Huh7 cells treated by LPS-CM and NaHS ( $n=4$ ). Data are represented as the mean  $\pm$  SEM of three individual experiments. # $p < 0.05$ , ## $p < 0.01$ , and ### $p < 0.001$  compared with the control group; \* $p < 0.05$ , \*\* $p < 0.01$ , and \*\*\* $p < 0.001$  compared with the LPS or LPS-CM group. CM, conditioned medium; IL-6, interleukin-6.
