# Supplementary material
Source: PubMed Central journal article supplement (PMC4742985)
Supplement: Supp_Figure3.pdf [file Supp_Figure3.pdf]

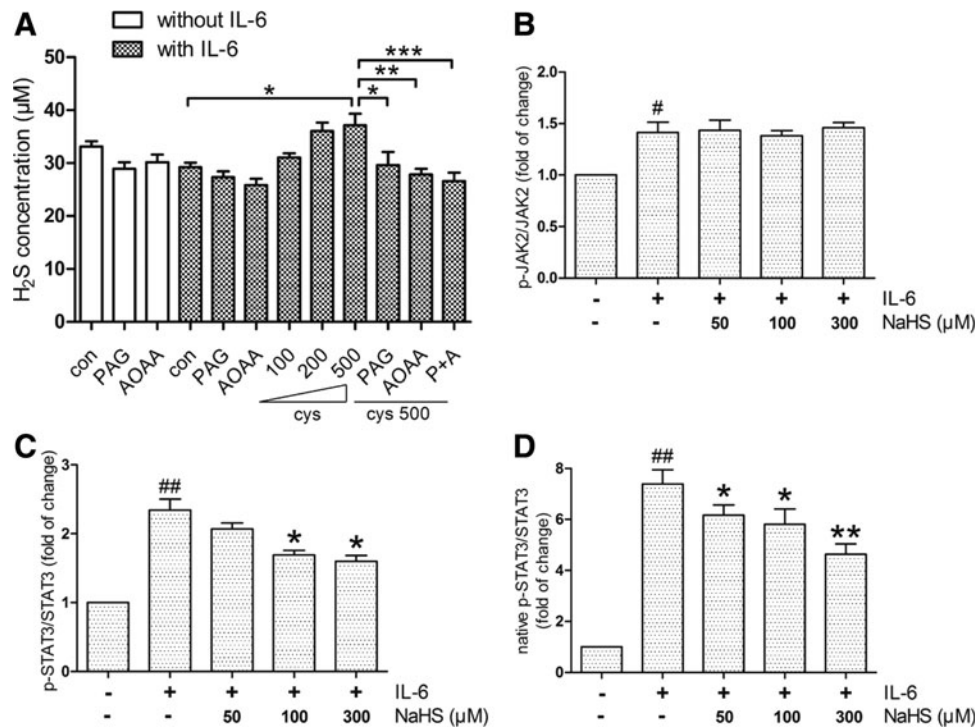

**SUPPLEMENTARY FIG. S3. H<sub>2</sub>S attenuated STAT3 activation via a JAK2-independent manner in the post-treatment model.** (A) H<sub>2</sub>S concentration in culture medium of Huh7 cells ( $n=3$ ). H<sub>2</sub>S level was increased by L-cysteine (100–500  $\mu$ M), but inhibited by PAG (2 mM) and AOAA (10  $\mu$ M). (B, C) Densitometry analysis of JAK2/STAT3 phosphorylation of Huh7 cells in the post-treatment model ( $n=4$ ). (D) Densitometry analysis of native p-STAT3 dimers in Huh7 cells ( $n=4$ ). Data are represented as the mean  $\pm$  SEM of three individual experiments. # $p < 0.05$  and ## $p < 0.01$  compared with the control group; \* $p < 0.05$ , \*\* $p < 0.01$ , and \*\*\* $p < 0.001$  compared with the IL-6 group unless indicated. P and A stand for PAG and AOAA, respectively. AOAA, aminooxyacetic acid; PAG, propargylglycine.
