# Supplementary material
Source: PubMed Central journal article supplement (PMC4742985)
Supplement: Supp_Figure4.pdf [file Supp_Figure4.pdf]

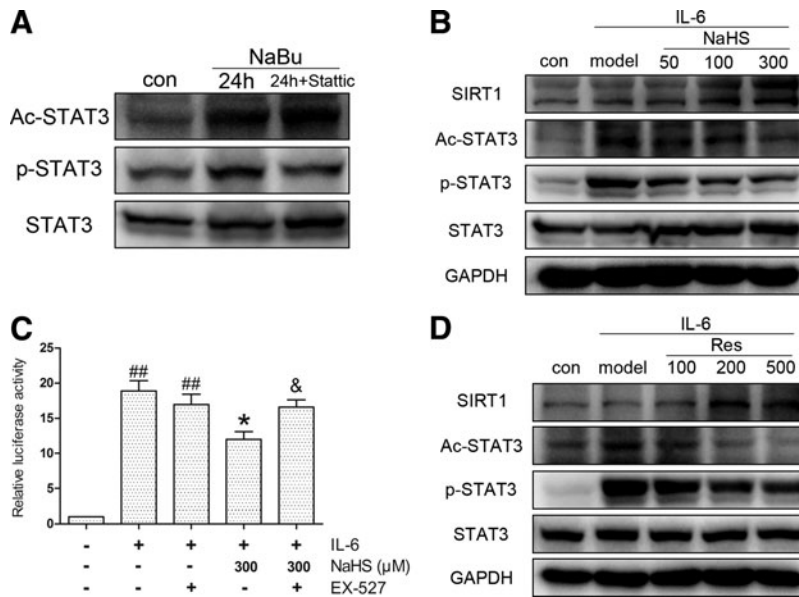

**SUPPLEMENTARY FIG. S4. Evaluation of STAT3 acetylation and SIRT1 in the induction of hepcidin.** (A) NaBu (1 mM), an HDAC inhibitor, increased the STAT3 acetylation level and added to STAT3 phosphorylation as well ( $n=3$ ). The induction in p-STAT3 was abolished by static (10  $\mu$ M). (B) NaHS promoted SIRT1 expression and suppressed IL-6-induced STAT3 acetylation and phosphorylation in mouse primary hepatocytes ( $n=3$ ). (C) EX-527 (10  $\mu$ M) blocked the inhibition of NaHS on STAT3 transcriptional function assessed by SIE reporter ( $n=5$ ). (D) Resveratrol pretreatment, similar to NaHS, promoted SIRT1 and inhibited STAT3 acetylation and phosphorylation irritated by IL-6 ( $n=3$ ). GAPDH served as the loading control. Representative immunoblots are presented. Data are represented as the mean  $\pm$  SEM of three individual experiments. <sup>##</sup> $p < 0.01$  compared with the control group; <sup>\*</sup> $p < 0.05$  compared with the IL-6 group; <sup>&</sup> $p < 0.05$  compared with the IL-6+NaHS group. GAPDH, glyceraldehyde-3-phosphate dehydrogenase; SIRT1, sirtuin 1.
