# Supplementary material
Source: PubMed Central journal article supplement (PMC4742985)
Supplement: Supp_Figure5.pdf [file Supp_Figure5.pdf]

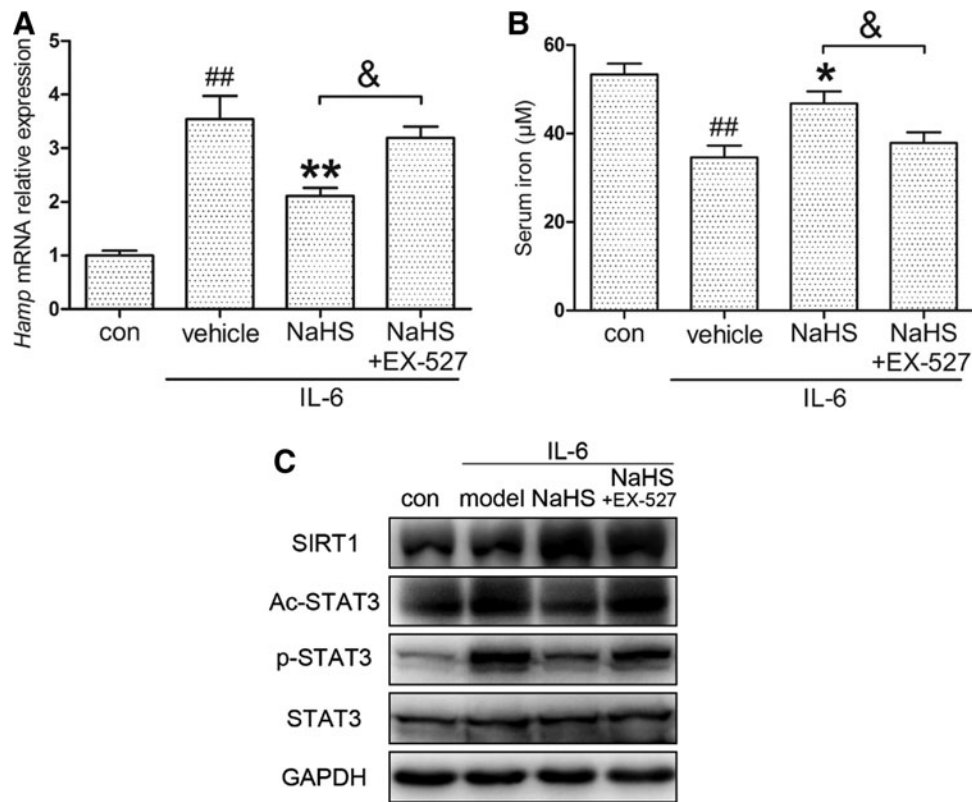

**SUPPLEMENTARY FIG. S5. NaHS inhibited hepatic hepcidin via SIRT1 in mice injected with IL-6.** C57BL/6 mice were pretreated with NaHS for 3 days (6 mg/kg/day). EX-527 (10 mg/kg) was applied 1 h before the last NaHS injection. Mice were sacrificed 6 h after IL-6 (25 µg/g) challenge. (A) NaHS attenuated the hepatic *Hamp* level, which was abolished by EX-527 ( $n=6$ ). (B) EX-527 diminished the improvement of serum iron by NaHS ( $n=6$ ). (C) Inhibition of SIRT1 by EX-527 reversed STAT3 acetylation and phosphorylation ( $n=6$ ). GAPDH served as the loading control. Representative immunoblots are presented. Data are represented as the mean  $\pm$  SEM of three individual experiments. <sup>##</sup> $p < 0.01$  compared with the control group; <sup>\*</sup> $p < 0.05$  and <sup>\*\*</sup> $p < 0.01$  compared with the IL-6 group; <sup>&</sup> $p < 0.05$  compared with the IL-6 + NaHS group.
